# Supplementary material for: Phosphorylation of NHE3-S719 regulates NHE3 activity through the formation of multiple signaling complexes
Source: PubMed Central journal article supplement — Mol Biol Cell. 2017 Jul 1;28(13):1754–67. doi: 10.1091/mbc.E16-12-0862 (PMC5491184; doi:10.1091/mbc.e16-12-0862), 2017-07-01
Supplement: supp_E16-12-0862v1_CombinedSupMats.pdf [file supp_E16-12-0862v1_CombinedSupMats.pdf]

# Supplemental Materials

*Molecular Biology of the Cell*

Sarker et al.

## Supplementary Table S1.

Comparison of proteins immunoprecipitated from NHE3-Wt and NHE3-S719A. This is the full list of co-immunoprecipitated proteins listed in order from lowest highest NHE3-S719S/NHE3-Wt. Identified proteins were normalized according to the ratio of NHE3-Wt and NHE3-S719A total unique spectral counts (spectra on peptide sequences that are unique to a protein). Any negative or 0 value considered 1.

| Identified Proteins                                                                          | Accession No | MW      | Exclusive Unique Spect Count Normalized |       |          |
|----------------------------------------------------------------------------------------------|--------------|---------|-----------------------------------------|-------|----------|
|                                                                                              |              |         | Wt                                      | S719A | S719A/Wt |
| 26S proteasome non-ATPase regulatory subunit 1 isoform 1 [Homo sapiens]                      | gi 25777600  | 106 kDa | 12.0                                    | 1.0   | 0.08     |
| large proline-rich protein BAG6 isoform a [Homo sapiens]                                     | gi 149158692 | 119 kDa | 11.0                                    | 1.0   | 0.09     |
| heat shock 70 kDa protein 6 [Homo sapiens]                                                   | gi 34419635  | 71 kDa  | 11.0                                    | 1.0   | 0.09     |
| 26S protease regulatory subunit 6A [Homo sapiens]                                            | gi 21361144  | 49 kDa  | 11.0                                    | 1.0   | 0.09     |
| 26S protease regulatory subunit 6B isoform 2 [Homo sapiens]                                  | gi 24430155  | 44 kDa  | 11.0                                    | 1.0   | 0.09     |
| long-chain-fatty-acid--CoA ligase 1 isoform a [Homo sapiens]                                 | gi 40807491  | 78 kDa  | 10.0                                    | 1.0   | 0.10     |
| dnaJ homolog subfamily B member 1 isoform 1 [Homo sapiens]                                   | gi 5453690   | 38 kDa  | 9.0                                     | 1.0   | 0.11     |
| ribosome-binding protein 1 [Homo sapiens]                                                    | gi 110611218 | 109 kDa | 9.0                                     | 1.0   | 0.11     |
| 26S proteasome non-ATPase regulatory subunit 3 [Homo sapiens]                                | gi 25777612  | 61 kDa  | 8.0                                     | 1.0   | 0.13     |
| 26S proteasome non-ATPase regulatory subunit 13 isoform 1 [Homo sapiens]                     | gi 157502193 | 43 kDa  | 8.0                                     | 1.0   | 0.13     |
| T-complex protein 1 subunit gamma isoform a [Homo sapiens]                                   | gi 63162572  | 61 kDa  | 8.0                                     | 1.0   | 0.13     |
| FAS-associated factor 2 [Homo sapiens]                                                       | gi 24797106  | 53 kDa  | 7.0                                     | 1.0   | 0.14     |
| myosin-9 [Homo sapiens]                                                                      | gi 12667788  | 227 kDa | 7.0                                     | 1.0   | 0.14     |
| solute carrier family 2, facilitated glucose transporter member 1 [Homo sapiens]             | gi 166795299 | 54 kDa  | 6.0                                     | 1.0   | 0.17     |
| sequestosome-1 isoform 2 [Homo sapiens]                                                      | gi 214830438 | 39 kDa  | 6.0                                     | 1.0   | 0.17     |
| 26S proteasome non-ATPase regulatory subunit 11 [Homo sapiens]                               | gi 28872725  | 47 kDa  | 6.0                                     | 1.0   | 0.17     |
| PREDICTED: 26S protease regulatory subunit 8 isoform X1 [Homo sapiens]                       | gi 578831151 | 46 kDa  | 6.0                                     | 1.0   | 0.17     |
| 4F2 cell-surface antigen heavy chain isoform b [Homo sapiens]                                | gi 61744477  | 68 kDa  | 6.0                                     | 1.0   | 0.17     |
| 26S protease regulatory subunit 10B [Homo sapiens]                                           | gi 195539395 | 46 kDa  | 6.0                                     | 1.0   | 0.17     |
| stromal interaction molecule 1 isoform 2 precursor [Homo sapiens]                            | gi 21070997  | 77 kDa  | 6.0                                     | 1.0   | 0.17     |
| UDP-glucuronosyltransferase 2B17 precursor [Homo sapiens]                                    | gi 4507821   | 61 kDa  | 6.0                                     | 1.0   | 0.17     |
| very long-chain acyl-CoA synthetase isoform 1 [Homo sapiens]                                 | gi 227499619 | 70 kDa  | 6.0                                     | 1.0   | 0.17     |
| heterogeneous nuclear ribonucleoprotein H [Homo sapiens]                                     | gi 381342476 | 49 kDa  | 5.0                                     | 1.0   | 0.20     |
| ubiquitin-associated domain-containing protein 2 isoform 1 precursor [Homo sapiens]          | gi 221316645 | 39 kDa  | 5.0                                     | 1.0   | 0.20     |
| apoptosis-inducing factor 1, mitochondrial isoform 2 precursor [Homo sapiens]                | gi 22202629  | 66 kDa  | 5.0                                     | 1.0   | 0.20     |
| ATP-binding cassette sub-family D member 3 isoform a [Homo sapiens]                          | gi 4506341   | 75 kDa  | 5.0                                     | 1.0   | 0.20     |
| neutral alpha-glucosidase AB isoform 3 precursor [Homo sapiens]                              | gi 88900491  | 109 kDa | 5.0                                     | 1.0   | 0.20     |
| T-complex protein 1 subunit alpha isoform a [Homo sapiens]                                   | gi 57863257  | 60 kDa  | 5.0                                     | 1.0   | 0.20     |
| PREDICTED: splicing factor 3B subunit 1 isoform X1 [Homo sapiens]                            | gi 530370087 | 130 kDa | 5.0                                     | 1.0   | 0.20     |
| sarcoplasmic/endoplasmic reticulum calcium ATPase 2 isoform b [Homo sapiens]                 | gi 24638454  | 115 kDa | 5.0                                     | 1.0   | 0.20     |
| Golgi apparatus protein 1 isoform 2 precursor [Homo sapiens]                                 | gi 224586815 | 136 kDa | 5.0                                     | 1.0   | 0.20     |
| sphingosine-1-phosphate lyase 1 [Homo sapiens]                                               | gi 31982936  | 64 kDa  | 5.0                                     | 1.0   | 0.20     |
| histone H2B type 1-D [Homo sapiens]                                                          | gi 10800138  | 14 kDa  | 4.0                                     | 1.0   | 0.25     |
| proteasome subunit alpha type-7 [Homo sapiens]                                               | gi 4506189   | 28 kDa  | 4.0                                     | 1.0   | 0.25     |
| proteasome subunit alpha type-4 isoform 1 [Homo sapiens]                                     | gi 156713442 | 29 kDa  | 4.0                                     | 1.0   | 0.25     |
| proteasome subunit alpha type-1 isoform 1 [Homo sapiens]                                     | gi 23110935  | 30 kDa  | 4.0                                     | 1.0   | 0.25     |
| peroxiredoxin-6 [Homo sapiens]                                                               | gi 4758638   | 25 kDa  | 4.0                                     | 1.0   | 0.25     |
| proteasome subunit alpha type-3 isoform 2 [Homo sapiens]                                     | gi 23110939  | 28 kDa  | 4.0                                     | 1.0   | 0.25     |
| dolichyl-diphosphooligosaccharide--protein glycosyltransferase subunit STT3B [Homo sapiens]  | gi 30578410  | 94 kDa  | 4.0                                     | 1.0   | 0.25     |
| 26S proteasome non-ATPase regulatory subunit 12 isoform 1 [Homo sapiens]                     | gi 4506221   | 53 kDa  | 4.0                                     | 1.0   | 0.25     |
| protein TBRG4 isoform 3 [Homo sapiens]                                                       | gi 387912543 | 72 kDa  | 4.0                                     | 1.0   | 0.25     |
| alcohol dehydrogenase 4 [Homo sapiens]                                                       | gi 71565152  | 40 kDa  | 4.0                                     | 1.0   | 0.25     |
| calcium/calmodulin-dependent protein kinase type II subunit delta isoform 5 [Homo sapiens]   | gi 212549753 | 56 kDa  | 4.0                                     | 1.0   | 0.25     |
| nicalin precursor [Homo sapiens]                                                             | gi 51873031  | 63 kDa  | 4.0                                     | 1.0   | 0.25     |
| rho-associated protein kinase 2 [Homo sapiens]                                               | gi 41872583  | 161 kDa | 4.0                                     | 1.0   | 0.25     |
| estradiol 17-beta-dehydrogenase 12 [Homo sapiens]                                            | gi 7705855   | 34 kDa  | 4.0                                     | 1.0   | 0.25     |
| lanosterol 14-alpha demethylase isoform 2 [Homo sapiens]                                     | gi 225903399 | 46 kDa  | 4.0                                     | 1.0   | 0.25     |
| ubiquitin-like protein 4A [Homo sapiens]                                                     | gi 7657667   | 18 kDa  | 4.0                                     | 1.0   | 0.25     |
| 26S proteasome non-ATPase regulatory subunit 4 [Homo sapiens]                                | gi 5292161   | 41 kDa  | 4.0                                     | 1.0   | 0.25     |
| BAG family molecular chaperone regulator 5 isoform b [Homo sapiens]                          | gi 62548854  | 51 kDa  | 4.0                                     | 1.0   | 0.25     |
| hydroxysteroid dehydrogenase-like protein 2 isoform 2 [Homo sapiens]                         | gi 308044580 | 37 kDa  | 4.0                                     | 1.0   | 0.25     |
| PREDICTED: HLA class I histocompatibility antigen, A-2 alpha chain isoform X3 [Homo sapiens] | gi 530429121 | 44 kDa  | 4.0                                     | 1.0   | 0.25     |
| PREDICTED: fragile X mental retardation syndrome-related protein 1 isoform X1 [Homo sapiens] | gi 530375353 | 89 kDa  | 4.0                                     | 1.0   | 0.25     |
| heterogeneous nuclear ribonucleoprotein M isoform a [Homo sapiens]                           | gi 14141152  | 78 kDa  | 4.0                                     | 1.0   | 0.25     |
| adipocyte plasma membrane-associated protein [Homo sapiens]                                  | gi 24308201  | 46 kDa  | 4.0                                     | 1.0   | 0.25     |
| catenin delta-1 isoform 3A [Homo sapiens]                                                    | gi 146231948 | 93 kDa  | 4.0                                     | 1.0   | 0.25     |
| coatamer subunit beta [Homo sapiens]                                                         | gi 221316630 | 107 kDa | 4.0                                     | 1.0   | 0.25     |
| PREDICTED: E3 ubiquitin-protein ligase HUWE1 isoform X1 [Homo sapiens]                       | gi 530426344 | 482 kDa | 4.0                                     | 1.0   | 0.25     |
| calcineurin B homologous protein 1 [Homo sapiens]                                            | gi 6005731   | 22 kDa  | 9.0                                     | 2.8   | 0.31     |
| dnaJ homolog subfamily A member 2 [Homo sapiens]                                             | gi 5031741   | 46 kDa  | 9.0                                     | 2.8   | 0.31     |
| calnexin precursor [Homo sapiens]                                                            | gi 10716563  | 68 kDa  | 13.0                                    | 4.1   | 0.32     |
| histone H3.1 [Homo sapiens]                                                                  | gi 10440560  | 15 kDa  | 3.0                                     | 1.0   | 0.33     |
| histone H1.2 [Homo sapiens]                                                                  | gi 4885375   | 21 kDa  | 3.0                                     | 1.0   | 0.33     |
| proteasome subunit beta type-2 isoform 1 [Homo sapiens]                                      | gi 4506195   | 23 kDa  | 3.0                                     | 1.0   | 0.33     |

|                                                                                                        |              |         |      |     |      |
|--------------------------------------------------------------------------------------------------------|--------------|---------|------|-----|------|
| 26S proteasome non-ATPase regulatory subunit 14 [Homo sapiens]                                         | gi 5031981   | 35 kDa  | 3.0  | 1.0 | 0.33 |
| ras-related protein Rab-5C isoform b [Homo sapiens]                                                    | gi 354721184 | 27 kDa  | 3.0  | 1.0 | 0.33 |
| wolframin [Homo sapiens]                                                                               | gi 224994203 | 100 kDa | 3.0  | 1.0 | 0.33 |
| nucleolin [Homo sapiens]                                                                               | gi 55956788  | 77 kDa  | 3.0  | 1.0 | 0.33 |
| chloride channel CLIC-like protein 1 isoform 1 precursor [Homo sapiens]                                | gi 115270970 | 62 kDa  | 3.0  | 1.0 | 0.33 |
| regulator of microtubule dynamics protein 1 isoform 1 [Homo sapiens]                                   | gi 116875831 | 36 kDa  | 3.0  | 1.0 | 0.33 |
| reticulocalbin-2 isoform b precursor [Homo sapiens]                                                    | gi 426214088 | 39 kDa  | 3.0  | 1.0 | 0.33 |
| methyltransferase-like protein 7B precursor [Homo sapiens]                                             | gi 164663805 | 28 kDa  | 3.0  | 1.0 | 0.33 |
| protein transport protein Sec61 subunit alpha isoform 1 [Homo sapiens]                                 | gi 7019415   | 52 kDa  | 3.0  | 1.0 | 0.33 |
| histone H1.5 [Homo sapiens]                                                                            | gi 4885381   | 23 kDa  | 3.0  | 1.0 | 0.33 |
| 26S proteasome non-ATPase regulatory subunit 6 isoform 1 [Homo sapiens]                                | gi 422398832 | 52 kDa  | 3.0  | 1.0 | 0.33 |
| coatamer subunit gamma-1 [Homo sapiens]                                                                | gi 11559929  | 98 kDa  | 3.0  | 1.0 | 0.33 |
| voltage-dependent anion-selective channel protein 2 isoform 1 [Homo sapiens]                           | gi 296317337 | 33 kDa  | 3.0  | 1.0 | 0.33 |
| fructose-bisphosphate aldolase A isoform 1 [Homo sapiens]                                              | gi 193794814 | 39 kDa  | 3.0  | 1.0 | 0.33 |
| serine/threonine-protein phosphatase PGAM5, mitochondrial isoform 1 [Homo sapiens]                     | gi 281604136 | 32 kDa  | 3.0  | 1.0 | 0.33 |
| dnaj homolog subfamily C member 7 isoform 2 [Homo sapiens]                                             | gi 221219056 | 50 kDa  | 3.0  | 1.0 | 0.33 |
| multidrug resistance protein 1 [Homo sapiens]                                                          | gi 42741659  | 141 kDa | 3.0  | 1.0 | 0.33 |
| annexin A7 isoform 1 [Homo sapiens]                                                                    | gi 4502111   | 50 kDa  | 3.0  | 1.0 | 0.33 |
| ezrin [Homo sapiens]                                                                                   | gi 161702986 | 69 kDa  | 3.0  | 1.0 | 0.33 |
| 60S ribosomal protein L35a [Homo sapiens]                                                              | gi 16117791  | 13 kDa  | 3.0  | 1.0 | 0.33 |
| heterogeneous nuclear ribonucleoprotein F [Homo sapiens]                                               | gi 148470397 | 46 kDa  | 3.0  | 1.0 | 0.33 |
| hydroxymethylglutaryl-CoA synthase, mitochondrial isoform 1 precursor [Homo sapiens]                   | gi 5031751   | 57 kDa  | 3.0  | 1.0 | 0.33 |
| heterogeneous nuclear ribonucleoprotein A1 isoform b [Homo sapiens]                                    | gi 14043070  | 39 kDa  | 3.0  | 1.0 | 0.33 |
| leucine-rich repeat-containing protein 57 [Homo sapiens]                                               | gi 194394161 | 27 kDa  | 3.0  | 1.0 | 0.33 |
| ruvB-like 1 [Homo sapiens]                                                                             | gi 4506753   | 50 kDa  | 3.0  | 1.0 | 0.33 |
| volume-regulated anion channel subunit LRRC8B [Homo sapiens]                                           | gi 197333692 | 92 kDa  | 3.0  | 1.0 | 0.33 |
| heterogeneous nuclear ribonucleoprotein L isoform a [Homo sapiens]                                     | gi 52632383  | 64 kDa  | 3.0  | 1.0 | 0.33 |
| aspartate--tRNA ligase, cytoplasmic isoform 1 [Homo sapiens]                                           | gi 45439306  | 57 kDa  | 3.0  | 1.0 | 0.33 |
| BAG family molecular chaperone regulator 3 [Homo sapiens]                                              | gi 14043024  | 62 kDa  | 3.0  | 1.0 | 0.33 |
| ER membrane protein complex subunit 1 isoform 1 precursor [Homo sapiens]                               | gi 22095331  | 112 kDa | 3.0  | 1.0 | 0.33 |
| PREDICTED: dnaj homolog subfamily B member 4 isoform X1 [Homo sapiens]                                 | gi 530361651 | 25 kDa  | 3.0  | 1.0 | 0.33 |
| PREDICTED: UPF0378 protein KIAA0100 isoform X1 [Homo sapiens]                                          | gi 530411227 | 254 kDa | 3.0  | 1.0 | 0.33 |
| fatty acid synthase [Homo sapiens]                                                                     | gi 41872631  | 273 kDa | 3.0  | 1.0 | 0.33 |
| vesicular integral-membrane protein VIP36 precursor [Homo sapiens]                                     | gi 5803023   | 40 kDa  | 3.0  | 1.0 | 0.33 |
| alpha-amino adipic semialdehyde dehydrogenase isoform 3 [Homo sapiens]                                 | gi 320202964 | 54 kDa  | 3.0  | 1.0 | 0.33 |
| protein disulfide-isomerase A4 precursor [Homo sapiens]                                                | gi 4758304   | 73 kDa  | 3.0  | 1.0 | 0.33 |
| nuclear fragile X mental retardation-interacting protein 2 [Homo sapiens]                              | gi 32698730  | 76 kDa  | 3.0  | 1.0 | 0.33 |
| transmembrane 9 superfamily member 4 precursor [Homo sapiens]                                          | gi 164519076 | 75 kDa  | 3.0  | 1.0 | 0.33 |
| NADH dehydrogenase [ubiquinone] iron-sulfur protein 8, mitochondrial precursor [Homo sapiens]          | gi 4505371   | 24 kDa  | 3.0  | 1.0 | 0.33 |
| transmembrane protein 43 [Homo sapiens]                                                                | gi 13236587  | 45 kDa  | 3.0  | 1.0 | 0.33 |
| 40S ribosomal protein S12 [Homo sapiens]                                                               | gi 14277700  | 15 kDa  | 3.0  | 1.0 | 0.33 |
| vesicle-associated membrane protein-associated protein B/C isoform 1 [Homo sapiens]                    | gi 4759302   | 27 kDa  | 3.0  | 1.0 | 0.33 |
| 26S protease regulatory subunit 4 [Homo sapiens]                                                       | gi 24430151  | 49 kDa  | 8.0  | 2.8 | 0.35 |
| spectrin alpha chain, non-erythrocytic 1 isoform 2 [Homo sapiens]                                      | gi 154759259 | 285 kDa | 23.0 | 8.3 | 0.36 |
| 26S protease regulatory subunit 7 isoform 1 [Homo sapiens]                                             | gi 4506209   | 49 kDa  | 19.0 | 6.9 | 0.36 |
| dolichyl-diphosphooligosaccharide--protein glycosyltransferase 48 kDa subunit precursor [Homo sapiens] | gi 20070197  | 51 kDa  | 7.0  | 2.8 | 0.39 |
| filamin-C isoform a [Homo sapiens]                                                                     | gi 116805322 | 291 kDa | 7.0  | 2.8 | 0.39 |
| kinesin-like protein KIF11 [Homo sapiens]                                                              | gi 13699824  | 119 kDa | 7.0  | 2.8 | 0.39 |
| NADH-ubiquinone oxidoreductase 75 kDa subunit, mitochondrial isoform 2 precursor [Homo sapiens]        | gi 316983154 | 75 kDa  | 6.0  | 2.8 | 0.46 |
| phenylalanine--tRNA ligase alpha subunit [Homo sapiens]                                                | gi 4758340   | 58 kDa  | 6.0  | 2.8 | 0.46 |
| alpha-actinin-4 [Homo sapiens]                                                                         | gi 12025678  | 105 kDa | 6.0  | 2.8 | 0.46 |
| nodal modulator 1 precursor [Homo sapiens]                                                             | gi 51944953  | 134 kDa | 6.0  | 2.8 | 0.46 |
| stress-induced-phosphoprotein 1 isoform a [Homo sapiens]                                               | gi 544063423 | 68 kDa  | 6.0  | 2.8 | 0.46 |
| probable ATP-dependent RNA helicase DDX5 [Homo sapiens]                                                | gi 4758138   | 69 kDa  | 6.0  | 2.8 | 0.46 |
| carbamoyl-phosphate synthase [ammonia], mitochondrial isoform a precursor [Homo sapiens]               | gi 169790915 | 166 kDa | 12.0 | 5.5 | 0.46 |
| zinc finger protein 518A isoform b [Homo sapiens]                                                      | gi 512388677 | 106 kDa | 2.0  | 1.0 | 0.50 |
| cyclin-dependent kinase 1 isoform 1 [Homo sapiens]                                                     | gi 4502709   | 34 kDa  | 2.0  | 1.0 | 0.50 |
| eukaryotic translation initiation factor 6 isoform c [Homo sapiens]                                    | gi 31563374  | 24 kDa  | 2.0  | 1.0 | 0.50 |
| 60S ribosomal protein L10a [Homo sapiens]                                                              | gi 15431288  | 25 kDa  | 2.0  | 1.0 | 0.50 |
| proteasome subunit beta type-1 [Homo sapiens]                                                          | gi 4506193   | 26 kDa  | 2.0  | 1.0 | 0.50 |
| 40S ribosomal protein S20 isoform 1 [Homo sapiens]                                                     | gi 226246671 | 16 kDa  | 2.0  | 1.0 | 0.50 |
| 40S ribosomal protein S17 [Homo sapiens]                                                               | gi 4506693   | 16 kDa  | 2.0  | 1.0 | 0.50 |
| 60S ribosomal protein L22 proprotein [Homo sapiens]                                                    | gi 4506613   | 15 kDa  | 2.0  | 1.0 | 0.50 |
| Golgi to ER traffic protein 4 homolog [Homo sapiens]                                                   | gi 38570062  | 37 kDa  | 2.0  | 1.0 | 0.50 |
| 14-3-3 protein beta/alpha [Homo sapiens]                                                               | gi 21328448  | 28 kDa  | 2.0  | 1.0 | 0.50 |
| FAD-linked sulfhydryl oxidase ALR [Homo sapiens]                                                       | gi 54112432  | 23 kDa  | 2.0  | 1.0 | 0.50 |
| B box and SPRY domain-containing protein [Homo sapiens]                                                | gi 154354992 | 44 kDa  | 2.0  | 1.0 | 0.50 |
| 26S proteasome non-ATPase regulatory subunit 8 [Homo sapiens]                                          | gi 156631005 | 40 kDa  | 2.0  | 1.0 | 0.50 |
| prostaglandin E synthase 2 isoform 1 [Homo sapiens]                                                    | gi 13376617  | 42 kDa  | 2.0  | 1.0 | 0.50 |
| proteasome subunit beta type-6 isoform 1 proprotein [Homo sapiens]                                     | gi 23110925  | 25 kDa  | 2.0  | 1.0 | 0.50 |
| 40S ribosomal protein S15 [Homo sapiens]                                                               | gi 4506687   | 17 kDa  | 2.0  | 1.0 | 0.50 |
| elongation factor 1-beta [Homo sapiens]                                                                | gi 11136628  | 25 kDa  | 2.0  | 1.0 | 0.50 |

|                                                                                                         |              |          |     |     |      |
|---------------------------------------------------------------------------------------------------------|--------------|----------|-----|-----|------|
| proteasome subunit alpha type-6 isoform a [Homo sapiens]                                                | gi 23110944  | 27 kDa   | 2.0 | 1.0 | 0.50 |
| proteasome subunit beta type-7 proprotein [Homo sapiens]                                                | gi 4506203   | 30 kDa   | 2.0 | 1.0 | 0.50 |
| cytochrome c oxidase subunit II (mitochondrion) [Homo sapiens]                                          | gi 251831110 | 26 kDa   | 2.0 | 1.0 | 0.50 |
| 60S acidic ribosomal protein P2 [Homo sapiens]                                                          | gi 4506671   | 12 kDa   | 2.0 | 1.0 | 0.50 |
| inorganic pyrophosphatase 2, mitochondrial isoform 1 precursor [Homo sapiens]                           | gi 29171702  | 38 kDa   | 2.0 | 1.0 | 0.50 |
| heat shock 70 kDa protein 4 [Homo sapiens]                                                              | gi 38327039  | 94 kDa   | 2.0 | 1.0 | 0.50 |
| PREDICTED: heparan-sulfate 6-O-sulfotransferase 2 isoform X2 [Homo sapiens]                             | gi 530422586 | 71 kDa   | 2.0 | 1.0 | 0.50 |
| trypsin-1 preproprotein [Homo sapiens]                                                                  | gi 4506145   | 27 kDa   | 2.0 | 1.0 | 0.50 |
| AFG3-like protein 2 [Homo sapiens]                                                                      | gi 300192933 | 89 kDa   | 2.0 | 1.0 | 0.50 |
| methylcrotonoyl-CoA carboxylase beta chain, mitochondrial [Homo sapiens]                                | gi 11545863  | 61 kDa   | 2.0 | 1.0 | 0.50 |
| carbohydrate sulfotransferase 13 precursor [Homo sapiens]                                               | gi 23097238  | 39 kDa   | 2.0 | 1.0 | 0.50 |
| proteasome subunit alpha type-2 [Homo sapiens]                                                          | gi 4506181   | 26 kDa   | 2.0 | 1.0 | 0.50 |
| PREDICTED: 14-3-3 protein epsilon isoform X1 [Homo sapiens]                                             | gi 530410617 | 27 kDa   | 2.0 | 1.0 | 0.50 |
| early endosome antigen 1 [Homo sapiens]                                                                 | gi 55770888  | 162 kDa  | 2.0 | 1.0 | 0.50 |
| fatty aldehyde dehydrogenase isoform 2 [Homo sapiens]                                                   | gi 4557303   | 55 kDa   | 2.0 | 1.0 | 0.50 |
| lamin-B receptor [Homo sapiens]                                                                         | gi 37595750  | 71 kDa   | 2.0 | 1.0 | 0.50 |
| choline dehydrogenase, mitochondrial [Homo sapiens]                                                     | gi 217272839 | 65 kDa   | 2.0 | 1.0 | 0.50 |
| NADH dehydrogenase [ubiquinone] iron-sulfur protein 2, mitochondrial isoform 2 precursor [Homo sapiens] | gi 260898743 | 52 kDa   | 2.0 | 1.0 | 0.50 |
| solute carrier family 12 member 2 isoform 2 [Homo sapiens]                                              | gi 374253823 | 130 kDa  | 2.0 | 1.0 | 0.50 |
| ATP-dependent RNA helicase DDX3X isoform 2 [Homo sapiens]                                               | gi 301171467 | 73 kDa   | 2.0 | 1.0 | 0.50 |
| lysophospholipid acyltransferase 7 isoform 2 [Homo sapiens]                                             | gi 225703033 | 45 kDa   | 2.0 | 1.0 | 0.50 |
| prostaglandin E synthase 3 isoform a [Homo sapiens]                                                     | gi 23308579  | 19 kDa   | 2.0 | 1.0 | 0.50 |
| PREDICTED: serum paraoxonase/arylesterase 2 isoform X1 [Homo sapiens]                                   | gi 530386128 | 32 kDa   | 2.0 | 1.0 | 0.50 |
| 60S ribosomal protein L38 [Homo sapiens]                                                                | gi 4506645   | 8 kDa    | 2.0 | 1.0 | 0.50 |
| transmembrane emp24 domain-containing protein 10 precursor [Homo sapiens]                               | gi 98986464  | 25 kDa   | 2.0 | 1.0 | 0.50 |
| UTP--glucose-1-phosphate uridylyltransferase isoform a [Homo sapiens]                                   | gi 48255966  | 57 kDa   | 2.0 | 1.0 | 0.50 |
| titin isoform N2-A [Homo sapiens]                                                                       | gi 291045225 | 3713 kDa | 2.0 | 1.0 | 0.50 |
| calreticulin precursor [Homo sapiens]                                                                   | gi 4757900   | 48 kDa   | 2.0 | 1.0 | 0.50 |
| PREDICTED: ER membrane protein complex subunit 3 isoform X1 [Homo sapiens]                              | gi 530372853 | 30 kDa   | 2.0 | 1.0 | 0.50 |
| probable histidine--tRNA ligase, mitochondrial isoform 1 precursor [Homo sapiens]                       | gi 15029520  | 57 kDa   | 2.0 | 1.0 | 0.50 |
| cytochrome P450 2S1 precursor [Homo sapiens]                                                            | gi 13449277  | 56 kDa   | 2.0 | 1.0 | 0.50 |
| eukaryotic translation initiation factor 3 subunit J isoform 3 [Homo sapiens]                           | gi 547235562 | 23 kDa   | 2.0 | 1.0 | 0.50 |
| aldo-keto reductase family 1 member C3 isoform 1 [Homo sapiens]                                         | gi 24497583  | 37 kDa   | 2.0 | 1.0 | 0.50 |
| alpha-mannosidase 2 [Homo sapiens]                                                                      | gi 51477714  | 131 kDa  | 2.0 | 1.0 | 0.50 |
| probable ATP-dependent RNA helicase DDX17 isoform 3 [Homo sapiens]                                      | gi 148613856 | 80 kDa   | 2.0 | 1.0 | 0.50 |
| adenosine 3'-phospho 5'-phosphosulfate transporter 1 isoform a precursor [Homo sapiens]                 | gi 30026034  | 48 kDa   | 2.0 | 1.0 | 0.50 |
| long-chain-fatty-acid--CoA ligase 3 [Homo sapiens]                                                      | gi 42794752  | 80 kDa   | 2.0 | 1.0 | 0.50 |
| coronin-1C isoform a [Homo sapiens]                                                                     | gi 157412328 | 59 kDa   | 2.0 | 1.0 | 0.50 |
| complement C3 precursor [Homo sapiens]                                                                  | gi 115298678 | 187 kDa  | 2.0 | 1.0 | 0.50 |
| 26S proteasome non-ATPase regulatory subunit 7 [Homo sapiens]                                           | gi 25777615  | 37 kDa   | 2.0 | 1.0 | 0.50 |
| TAR DNA-binding protein 43 [Homo sapiens]                                                               | gi 6678271   | 45 kDa   | 2.0 | 1.0 | 0.50 |
| glycine--tRNA ligase precursor [Homo sapiens]                                                           | gi 116805340 | 83 kDa   | 2.0 | 1.0 | 0.50 |
| eukaryotic translation initiation factor 3 subunit L isoform 2 [Homo sapiens]                           | gi 339275831 | 61 kDa   | 2.0 | 1.0 | 0.50 |
| monoacylglycerol lipase ABHD12 isoform a [Homo sapiens]                                                 | gi 109689718 | 45 kDa   | 2.0 | 1.0 | 0.50 |
| vesicle-associated membrane protein-associated protein A isoform 1 [Homo sapiens]                       | gi 94721250  | 33 kDa   | 2.0 | 1.0 | 0.50 |
| translocon-associated protein subunit delta isoform 1 precursor [Homo sapiens]                          | gi 325301072 | 20 kDa   | 2.0 | 1.0 | 0.50 |
| RNA-binding protein 14 isoform 1 [Homo sapiens]                                                         | gi 5454064   | 69 kDa   | 2.0 | 1.0 | 0.50 |
| coatamer subunit beta' [Homo sapiens]                                                                   | gi 4758032   | 102 kDa  | 2.0 | 1.0 | 0.50 |
| suppressor of cytokine signaling 6 [Homo sapiens]                                                       | gi 21450785  | 60 kDa   | 2.0 | 1.0 | 0.50 |
| clathrin heavy chain 1 isoform 1 [Homo sapiens]                                                         | gi 4758012   | 192 kDa  | 2.0 | 1.0 | 0.50 |
| peroxisomal bifunctional enzyme isoform 1 [Homo sapiens]                                                | gi 68989263  | 79 kDa   | 2.0 | 1.0 | 0.50 |
| GH3 domain-containing protein isoform 1 precursor [Homo sapiens]                                        | gi 14210490  | 58 kDa   | 2.0 | 1.0 | 0.50 |
| plectin isoform 1a [Homo sapiens]                                                                       | gi 41322923  | 516 kDa  | 2.0 | 1.0 | 0.50 |
| GPI transamidase component PIG-T isoform 1 precursor [Homo sapiens]                                     | gi 23397653  | 66 kDa   | 2.0 | 1.0 | 0.50 |
| prolyl 4-hydroxylase subunit alpha-1 isoform 2 precursor [Homo sapiens]                                 | gi 217272849 | 61 kDa   | 2.0 | 1.0 | 0.50 |
| quinone oxidoreductase isoform a [Homo sapiens]                                                         | gi 13236495  | 35 kDa   | 2.0 | 1.0 | 0.50 |
| transforming protein RhoA precursor [Homo sapiens]                                                      | gi 10835049  | 22 kDa   | 2.0 | 1.0 | 0.50 |
| dolichyl-diphosphooligosaccharide--protein glycosyltransferase subunit DAD1 [Homo sapiens]              | gi 4503253   | 12 kDa   | 2.0 | 1.0 | 0.50 |
| pre-mRNA-processing factor 6 [Homo sapiens]                                                             | gi 40807485  | 107 kDa  | 2.0 | 1.0 | 0.50 |
| stearoyl-CoA desaturase 5 isoform b [Homo sapiens]                                                      | gi 148596938 | 29 kDa   | 2.0 | 1.0 | 0.50 |
| cytoskeleton-associated protein 4 [Homo sapiens]                                                        | gi 19920317  | 66 kDa   | 2.0 | 1.0 | 0.50 |
| torsin-1A-interacting protein 2 isoform b [Homo sapiens]                                                | gi 21450775  | 51 kDa   | 2.0 | 1.0 | 0.50 |
| peptidyl-prolyl cis-trans isomerase FKBP5 isoform 1 [Homo sapiens]                                      | gi 224809327 | 51 kDa   | 2.0 | 1.0 | 0.50 |
| zinc finger CCH-type antiviral protein 1 isoform 1 [Homo sapiens]                                       | gi 27477136  | 101 kDa  | 2.0 | 1.0 | 0.50 |
| PREDICTED: valine--tRNA ligase isoform X1 [Homo sapiens]                                                | gi 530382523 | 141 kDa  | 2.0 | 1.0 | 0.50 |
| heterogeneous nuclear ribonucleoprotein A3 [Homo sapiens]                                               | gi 34740329  | 40 kDa   | 2.0 | 1.0 | 0.50 |
| RNA-binding protein FUS isoform 3 [Homo sapiens]                                                        | gi 283135173 | 53 kDa   | 2.0 | 1.0 | 0.50 |
| 40S ribosomal protein S8 [Homo sapiens]                                                                 | gi 4506743   | 24 kDa   | 2.0 | 1.0 | 0.50 |
| ATP synthase subunit g, mitochondrial [Homo sapiens]                                                    | gi 51479156  | 11 kDa   | 2.0 | 1.0 | 0.50 |
| MICOS complex subunit MIC19 [Homo sapiens]                                                              | gi 8923390   | 26 kDa   | 2.0 | 1.0 | 0.50 |
| hsc70-interacting protein isoform 1 [Homo sapiens]                                                      | gi 19923193  | 41 kDa   | 2.0 | 1.0 | 0.50 |
| serine palmitoyltransferase 1 isoform c [Homo sapiens]                                                  | gi 526252798 | 57 kDa   | 2.0 | 1.0 | 0.50 |

|                                                                                                             |              |         |      |      |      |
|-------------------------------------------------------------------------------------------------------------|--------------|---------|------|------|------|
| 40S ribosomal protein S10 [Homo sapiens]                                                                    | gi 322303127 | 19 kDa  | 2.0  | 1.0  | 0.50 |
| transferrin receptor protein 1 [Homo sapiens]                                                               | gi 189458817 | 85 kDa  | 2.0  | 1.0  | 0.50 |
| ubiquitin carboxyl-terminal hydrolase 7 isoform 1 [Homo sapiens]                                            | gi 150378533 | 128 kDa | 2.0  | 1.0  | 0.50 |
| myristoylated alanine-rich C-kinase substrate [Homo sapiens]                                                | gi 153070260 | 32 kDa  | 2.0  | 1.0  | 0.50 |
| SUN domain-containing protein 1 isoform b [Homo sapiens]                                                    | gi 110227866 | 78 kDa  | 2.0  | 1.0  | 0.50 |
| gasdermin-A [Homo sapiens]                                                                                  | gi 150456463 | 49 kDa  | 2.0  | 1.0  | 0.50 |
| tubulin alpha-4A chain isoform 2 [Homo sapiens]                                                             | gi 514052659 | 48 kDa  | 2.0  | 1.0  | 0.50 |
| 60S ribosomal protein L24 [Homo sapiens]                                                                    | gi 4506619   | 18 kDa  | 2.0  | 1.0  | 0.50 |
| ATPase WRNIP1 isoform 1 [Homo sapiens]                                                                      | gi 18426902  | 72 kDa  | 2.0  | 1.0  | 0.50 |
| Na(+)/H(+) exchange regulatory cofactor NHE-RF3 isoform 1 [Homo sapiens]                                    | gi 21361142  | 57 kDa  | 2.0  | 1.0  | 0.50 |
| neutral amino acid transporter B(0) isoform 1 [Homo sapiens]                                                | gi 5032093   | 57 kDa  | 2.0  | 1.0  | 0.50 |
| ATP-dependent RNA helicase DDX39A [Homo sapiens]                                                            | gi 21040371  | 49 kDa  | 2.0  | 1.0  | 0.50 |
| nuclear protein localization protein 4 homolog [Homo sapiens]                                               | gi 157426879 | 68 kDa  | 2.0  | 1.0  | 0.50 |
| retinoic acid-induced protein 3 [Homo sapiens]                                                              | gi 4506403   | 40 kDa  | 2.0  | 1.0  | 0.50 |
| PREDICTED: UDP-glucose:glycoprotein glucosyltransferase 1 isoform X1 [Homo sapiens]                         | gi 578804601 | 177 kDa | 2.0  | 1.0  | 0.50 |
| 60S ribosomal protein L13a isoform 2 [Homo sapiens]                                                         | gi 395132450 | 17 kDa  | 2.0  | 1.0  | 0.50 |
| 14-3-3 protein eta [Homo sapiens]                                                                           | gi 4507951   | 28 kDa  | 2.0  | 1.0  | 0.50 |
| DNA replication licensing factor MCM3 isoform 1 [Homo sapiens]                                              | gi 394582093 | 96 kDa  | 2.0  | 1.0  | 0.50 |
| GPI ethanolamine phosphate transferase 3 isoform 1 [Homo sapiens]                                           | gi 23397648  | 119 kDa | 2.0  | 1.0  | 0.50 |
| matrin-3 isoform a [Homo sapiens]                                                                           | gi 21626466  | 95 kDa  | 2.0  | 1.0  | 0.50 |
| transmembrane protein 45B [Homo sapiens]                                                                    | gi 20270331  | 32 kDa  | 2.0  | 1.0  | 0.50 |
| 28S ribosomal protein S29, mitochondrial isoform 1 [Homo sapiens]                                           | gi 16905526  | 46 kDa  | 2.0  | 1.0  | 0.50 |
| staphylococcal nuclease domain-containing protein 1 [Homo sapiens]                                          | gi 77404397  | 102 kDa | 2.0  | 1.0  | 0.50 |
| ELAV-like protein 1 [Homo sapiens]                                                                          | gi 38201714  | 36 kDa  | 2.0  | 1.0  | 0.50 |
| histone deacetylase 6 [Homo sapiens]                                                                        | gi 13128864  | 131 kDa | 2.0  | 1.0  | 0.50 |
| PREDICTED: protein lin-7 homolog A isoform X1 [Homo sapiens]                                                | gi 530400962 | 20 kDa  | 2.0  | 1.0  | 0.50 |
| 26S proteasome non-ATPase regulatory subunit 2 isoform 1 [Homo sapiens]                                     | gi 25777602  | 100 kDa | 13.0 | 6.9  | 0.53 |
| dolichyl-diphosphooligosaccharide--protein glycosyltransferase subunit 2 isoform 1 precursor [Homo sapiens] | gi 35493916  | 69 kDa  | 5.0  | 2.8  | 0.55 |
| 60S ribosomal protein L12 [Homo sapiens]                                                                    | gi 4506597   | 18 kDa  | 5.0  | 2.8  | 0.55 |
| T-complex protein 1 subunit beta isoform 2 [Homo sapiens]                                                   | gi 311771535 | 53 kDa  | 5.0  | 2.8  | 0.55 |
| T-complex protein 1 subunit eta isoform d [Homo sapiens]                                                    | gi 261399877 | 55 kDa  | 5.0  | 2.8  | 0.55 |
| dnaJ homolog subfamily A member 1 [Homo sapiens]                                                            | gi 4504511   | 45 kDa  | 10.0 | 5.5  | 0.55 |
| elongation factor Tu, mitochondrial precursor [Homo sapiens]                                                | gi 34147630  | 50 kDa  | 10.0 | 5.5  | 0.55 |
| bifunctional glutamate/proline--tRNA ligase [Homo sapiens]                                                  | gi 62241042  | 171 kDa | 7.0  | 4.1  | 0.59 |
| calcium-binding mitochondrial carrier protein Aralar2 isoform 1 [Homo sapiens]                              | gi 237649019 | 74 kDa  | 9.0  | 5.5  | 0.61 |
| MICOS complex subunit MIC60 isoform 2 [Homo sapiens]                                                        | gi 154354962 | 84 kDa  | 9.0  | 5.5  | 0.61 |
| heat shock 70 kDa protein 1A/1B [Homo sapiens]                                                              | gi 167466173 | 70 kDa  | 27.0 | 16.6 | 0.61 |
| stress-70 protein, mitochondrial precursor [Homo sapiens]                                                   | gi 24234688  | 74 kDa  | 13.0 | 8.3  | 0.64 |
| hemoglobin subunit alpha [Homo sapiens]                                                                     | gi 4504345   | 15 kDa  | 4.0  | 2.8  | 0.69 |
| serine hydroxymethyltransferase, mitochondrial isoform 1 precursor [Homo sapiens]                           | gi 19923315  | 56 kDa  | 4.0  | 2.8  | 0.69 |
| heterogeneous nuclear ribonucleoprotein K isoform b [Homo sapiens]                                          | gi 14165435  | 51 kDa  | 4.0  | 2.8  | 0.69 |
| dipeptidyl peptidase 4 [Homo sapiens]                                                                       | gi 18765694  | 88 kDa  | 4.0  | 2.8  | 0.69 |
| lamin-B1 isoform 1 [Homo sapiens]                                                                           | gi 5031877   | 66 kDa  | 4.0  | 2.8  | 0.69 |
| 60S ribosomal protein L7 [Homo sapiens]                                                                     | gi 15431301  | 29 kDa  | 4.0  | 2.8  | 0.69 |
| ribonuclease T2 precursor [Homo sapiens]                                                                    | gi 5231228   | 29 kDa  | 4.0  | 2.8  | 0.69 |
| isocitrate dehydrogenase [NADP] cytoplasmic [Homo sapiens]                                                  | gi 28178825  | 47 kDa  | 4.0  | 2.8  | 0.69 |
| heterogeneous nuclear ribonucleoprotein U isoform b [Homo sapiens]                                          | gi 14141161  | 89 kDa  | 4.0  | 2.8  | 0.69 |
| mitochondrial dicarboxylate carrier isoform 2 [Homo sapiens]                                                | gi 20149598  | 31 kDa  | 4.0  | 2.8  | 0.69 |
| 40S ribosomal protein S3a isoform 1 [Homo sapiens]                                                          | gi 4506723   | 30 kDa  | 4.0  | 2.8  | 0.69 |
| coatamer subunit delta isoform 1 [Homo sapiens]                                                             | gi 11863154  | 57 kDa  | 4.0  | 2.8  | 0.69 |
| heat shock protein HSP 90-alpha isoform 1 [Homo sapiens]                                                    | gi 153792590 | 98 kDa  | 6.0  | 4.1  | 0.69 |
| PREDICTED: inosine-5'-monophosphate dehydrogenase 2 isoform X1 [Homo sapiens]                               | gi 578806039 | 66 kDa  | 6.0  | 4.1  | 0.69 |
| protein disulfide-isomerase A6 isoform d precursor [Homo sapiens]                                           | gi 5031973   | 48 kDa  | 6.0  | 4.1  | 0.69 |
| UPF0317 protein C14orf159, mitochondrial isoform b precursor [Homo sapiens]                                 | gi 156139135 | 67 kDa  | 6.0  | 4.1  | 0.69 |
| 40S ribosomal protein S16 [Homo sapiens]                                                                    | gi 4506691   | 16 kDa  | 6.0  | 4.1  | 0.69 |
| non-POU domain-containing octamer-binding protein isoform 1 [Homo sapiens]                                  | gi 224028244 | 54 kDa  | 6.0  | 4.1  | 0.69 |
| leucine-rich PPR motif-containing protein, mitochondrial precursor [Homo sapiens]                           | gi 31621305  | 158 kDa | 8.0  | 5.5  | 0.69 |
| 2-oxoglutarate dehydrogenase, mitochondrial isoform 1 precursor [Homo sapiens]                              | gi 51873036  | 116 kDa | 10.0 | 6.9  | 0.69 |
| transitional endoplasmic reticulum ATPase [Homo sapiens]                                                    | gi 6005942   | 89 kDa  | 19.0 | 13.8 | 0.73 |
| peroxisomal multifunctional enzyme type 2 isoform 2 [Homo sapiens]                                          | gi 4504505   | 80 kDa  | 7.0  | 5.5  | 0.79 |
| mitotic checkpoint protein BUB3 isoform b [Homo sapiens]                                                    | gi 56550081  | 37 kDa  | 7.0  | 5.5  | 0.79 |
| prohibitin-2 isoform 1 [Homo sapiens]                                                                       | gi 221307584 | 33 kDa  | 7.0  | 5.5  | 0.79 |
| signal recognition particle receptor subunit beta [Homo sapiens]                                            | gi 284795266 | 30 kDa  | 7.0  | 5.5  | 0.79 |
| delta-1-pyrroline-5-carboxylate synthase isoform 1 [Homo sapiens]                                           | gi 21361368  | 87 kDa  | 22.0 | 18.0 | 0.82 |
| persulfide dioxygenase ETHE1, mitochondrial [Homo sapiens]                                                  | gi 41327741  | 28 kDa  | 5.0  | 4.1  | 0.83 |
| cytosol aminopeptidase [Homo sapiens]                                                                       | gi 41393561  | 56 kDa  | 5.0  | 4.1  | 0.83 |
| P2X purinoceptor 4 isoform 2 [Homo sapiens]                                                                 | gi 28416927  | 43 kDa  | 5.0  | 4.1  | 0.83 |
| PREDICTED: very-long-chain enoyl-CoA reductase isoform X3 [Homo sapiens]                                    | gi 578833748 | 37 kDa  | 5.0  | 4.1  | 0.83 |
| protein disulfide-isomerase A3 precursor [Homo sapiens]                                                     | gi 21361657  | 57 kDa  | 5.0  | 4.1  | 0.83 |
| filamin-B isoform 2 [Homo sapiens]                                                                          | gi 105990514 | 278 kDa | 5.0  | 4.1  | 0.83 |
| ATP synthase subunit gamma, mitochondrial isoform L (liver) precursor [Homo sapiens]                        | gi 50345988  | 33 kDa  | 5.0  | 4.1  | 0.83 |
| prohibitin isoform 1 [Homo sapiens]                                                                         | gi 4505773   | 30 kDa  | 10.0 | 8.3  | 0.83 |

|                                                                                                         |                     |               |             |             |             |
|---------------------------------------------------------------------------------------------------------|---------------------|---------------|-------------|-------------|-------------|
| dolichyl-diphosphooligosaccharide--protein glycosyltransferase subunit 1 precursor [Homo sapiens]       | gi 4506675          | 69 kDa        | 13.0        | 11.1        | 0.85        |
| agmatinase, mitochondrial precursor [Homo sapiens]                                                      | gi 37537722         | 38 kDa        | 8.0         | 6.9         | 0.86        |
| peptidyl-prolyl cis-trans isomerase FKBP4 [Homo sapiens]                                                | gi 4503729          | 52 kDa        | 8.0         | 6.9         | 0.86        |
| tubulin beta chain isoform b [Homo sapiens]                                                             | gi 29788785         | 50 kDa        | 17.0        | 15.2        | 0.89        |
| 60S ribosomal protein L6 [Homo sapiens]                                                                 | gi 16753227         | 33 kDa        | 3.0         | 2.8         | 0.92        |
| serpin H1 precursor [Homo sapiens]                                                                      | gi 32454741         | 46 kDa        | 3.0         | 2.8         | 0.92        |
| aldehyde dehydrogenase X, mitochondrial precursor [Homo sapiens]                                        | gi 25777730         | 57 kDa        | 3.0         | 2.8         | 0.92        |
| peroxisomal trans-2-enoyl-CoA reductase [Homo sapiens]                                                  | gi 19923817         | 33 kDa        | 3.0         | 2.8         | 0.92        |
| 60S ribosomal protein L18 isoform 2 [Homo sapiens]                                                      | gi 395132436        | 18 kDa        | 3.0         | 2.8         | 0.92        |
| phosphoglycerate mutase 1 [Homo sapiens]                                                                | gi 4505753          | 29 kDa        | 3.0         | 2.8         | 0.92        |
| proliferating cell nuclear antigen [Homo sapiens]                                                       | gi 33239451         | 29 kDa        | 3.0         | 2.8         | 0.92        |
| lysine--tRNA ligase isoform 1 [Homo sapiens]                                                            | gi 194272210        | 71 kDa        | 3.0         | 2.8         | 0.92        |
| chloride intracellular channel protein 1 [Homo sapiens]                                                 | gi 14251209         | 27 kDa        | 3.0         | 2.8         | 0.92        |
| vesicle-trafficking protein SEC22b precursor [Homo sapiens]                                             | gi 380837121        | 25 kDa        | 3.0         | 2.8         | 0.92        |
| kanadaplin [Homo sapiens]                                                                               | gi 155722990        | 89 kDa        | 3.0         | 2.8         | 0.92        |
| PREDICTED: ruvB-like 2 isoform X1 [Homo sapiens]                                                        | gi 530415516        | 47 kDa        | 3.0         | 2.8         | 0.92        |
| 7-dehydrocholesterol reductase [Homo sapiens]                                                           | gi 119943112        | 54 kDa        | 3.0         | 2.8         | 0.92        |
| insulin-like growth factor 2 mRNA-binding protein 1 isoform 1 [Homo sapiens]                            | gi 56237027         | 63 kDa        | 6.0         | 5.5         | 0.92        |
| mitochondrial-processing peptidase subunit alpha isoform 1 precursor [Homo sapiens]                     | gi 24308013         | 58 kDa        | 6.0         | 5.5         | 0.92        |
| 60S ribosomal protein L9 [Homo sapiens]                                                                 | gi 15431303         | 22 kDa        | 6.0         | 5.5         | 0.92        |
| dolichyl-diphosphooligosaccharide--protein glycosyltransferase subunit STT3A isoform a [Homo sapiens]   | gi 22749415         | 81 kDa        | 6.0         | 5.5         | 0.92        |
| annexin A2 isoform 2 [Homo sapiens]                                                                     | gi 209862831        | 39 kDa        | 15.0        | 13.8        | 0.92        |
| endoplasmic reticulum protein precursor [Homo sapiens]                                                  | gi 4507677          | 92 kDa        | 9.0         | 8.3         | 0.92        |
| volume-regulated anion channel subunit LRRC8A [Homo sapiens]                                            | gi 187829871        | 94 kDa        | 19.0        | 18.0        | 0.95        |
| tubulin alpha-1B chain [Homo sapiens]                                                                   | gi 57013276         | 50 kDa        | 13.0        | 12.4        | 0.96        |
| PREDICTED: erlin-2 isoform X1 [Homo sapiens]                                                            | gi 530387547        | 50 kDa        | 13.0        | 12.4        | 0.96        |
| pyruvate kinase PKM isoform a [Homo sapiens]                                                            | gi 33286418         | 58 kDa        | 13.0        | 12.4        | 0.96        |
| spectrin beta chain, non-erythrocytic 1 isoform 1 [Homo sapiens]                                        | gi 112382250        | 275 kDa       | 23.0        | 22.1        | 0.96        |
| ATP synthase subunit alpha, mitochondrial isoform a precursor [Homo sapiens]                            | gi 4757810          | 60 kDa        | 10.0        | 9.7         | 0.97        |
| polyubiquitin-B precursor [Homo sapiens]                                                                | gi 11024714         | 26 kDa        | 7.0         | 6.9         | 0.99        |
| estradiol 17-beta-dehydrogenase 8 [Homo sapiens]                                                        | gi 15277342         | 27 kDa        | 7.0         | 6.9         | 0.99        |
| alanine aminotransferase 2 isoform 1 [Homo sapiens]                                                     | gi 19263340         | 58 kDa        | 7.0         | 6.9         | 0.99        |
| 60 kDa heat shock protein, mitochondrial [Homo sapiens]                                                 | gi 31542947         | 61 kDa        | 18.0        | 18.0        | 1.00        |
| <b>sodium/hydrogen exchanger 3 precursor [Oryctolagus cuniculus]</b>                                    | <b>gi 130504821</b> | <b>93 kDa</b> | <b>47.0</b> | <b>47.0</b> | <b>1.00</b> |
| sperm flagellar protein 1 [Homo sapiens]                                                                | gi 89363026         | 27 kDa        | 1.0         | 1.0         | 1.00        |
| deoxyribose-phosphate aldolase isoform 1 [Homo sapiens]                                                 | gi 116063554        | 35 kDa        | 1.0         | 1.0         | 1.00        |
| dermcidin isoform 1 preproprotein [Homo sapiens]                                                        | gi 16751921         | 11 kDa        | 1.0         | 1.0         | 1.00        |
| proteasome subunit beta type-5 isoform 1 [Homo sapiens]                                                 | gi 4506201          | 28 kDa        | 1.0         | 1.0         | 1.00        |
| mitochondrial import receptor subunit TOM22 homolog [Homo sapiens]                                      | gi 9910382          | 16 kDa        | 1.0         | 1.0         | 1.00        |
| proteasome subunit alpha type-5 isoform 1 [Homo sapiens]                                                | gi 23110942         | 26 kDa        | 1.0         | 1.0         | 1.00        |
| F-box only protein 22 isoform a [Homo sapiens]                                                          | gi 22547149         | 45 kDa        | 1.0         | 1.0         | 1.00        |
| retinoblastoma-like protein 2 [Homo sapiens]                                                            | gi 172072597        | 128 kDa       | 1.0         | 1.0         | 1.00        |
| ATP-dependent (S)-NAD(P)H-hydrate dehydratase isoform a [Homo sapiens]                                  | gi 119709830        | 41 kDa        | 1.0         | 1.0         | 1.00        |
| protein S100-A9 [Homo sapiens]                                                                          | gi 4506773          | 13 kDa        | 1.0         | 1.0         | 1.00        |
| dystrophin Dp427c isoform [Homo sapiens]                                                                | gi 5032281          | 426 kDa       | 1.0         | 1.0         | 1.00        |
| adenylate kinase 2, mitochondrial isoform c [Homo sapiens]                                              | gi 312836806        | 25 kDa        | 1.0         | 1.0         | 1.00        |
| PREDICTED: protein CutA isoform X1 [Homo sapiens]                                                       | gi 578811722        | 19 kDa        | 1.0         | 1.0         | 1.00        |
| methylthioribose-1-phosphate isomerase isoform 1 [Homo sapiens]                                         | gi 72534748         | 39 kDa        | 1.0         | 1.0         | 1.00        |
| pterin-4-alpha-carbinolamine dehydratase isoform 1 [Homo sapiens]                                       | gi 4557831          | 12 kDa        | 1.0         | 1.0         | 1.00        |
| cathepsin D preproprotein [Homo sapiens]                                                                | gi 4503143          | 45 kDa        | 1.0         | 1.0         | 1.00        |
| 40S ribosomal protein S13 [Homo sapiens]                                                                | gi 4506685          | 17 kDa        | 1.0         | 1.0         | 1.00        |
| BR13-binding protein precursor [Homo sapiens]                                                           | gi 19923665         | 28 kDa        | 1.0         | 1.0         | 1.00        |
| PREDICTED: rho guanine nucleotide exchange factor 15 isoform X3 [Homo sapiens]                          | gi 578829770        | 85 kDa        | 1.0         | 1.0         | 1.00        |
| arginase-1 isoform 2 [Homo sapiens]                                                                     | gi 10947139         | 35 kDa        | 1.0         | 1.0         | 1.00        |
| 1,4-alpha-glucan-branching enzyme [Homo sapiens]                                                        | gi 189458812        | 80 kDa        | 1.0         | 1.0         | 1.00        |
| fatty acid-binding protein, epidermal [Homo sapiens]                                                    | gi 4557581          | 15 kDa        | 1.0         | 1.0         | 1.00        |
| NADH dehydrogenase [ubiquinone] 1 alpha subcomplex assembly factor 3 isoform a precursor [Homo sapiens] | gi 41327781         | 20 kDa        | 1.0         | 1.0         | 1.00        |
| proteasome subunit beta type-3 [Homo sapiens]                                                           | gi 22538465         | 23 kDa        | 1.0         | 1.0         | 1.00        |
| 60S ribosomal protein L34 [Homo sapiens]                                                                | gi 16117787         | 13 kDa        | 1.0         | 1.0         | 1.00        |
| WD repeat-containing protein 1 isoform 1 [Homo sapiens]                                                 | gi 9257257          | 66 kDa        | 1.0         | 1.0         | 1.00        |
| NADH dehydrogenase [ubiquinone] flavoprotein 1, mitochondrial isoform 1 precursor [Homo sapiens]        | gi 20149568         | 51 kDa        | 1.0         | 1.0         | 1.00        |
| 60S ribosomal protein L23a [Homo sapiens]                                                               | gi 17105394         | 18 kDa        | 1.0         | 1.0         | 1.00        |
| small nuclear ribonucleoprotein-associated protein N [Homo sapiens]                                     | gi 13027644         | 25 kDa        | 1.0         | 1.0         | 1.00        |
| probable Xaa-Pro aminopeptidase 3 isoform 1 [Homo sapiens]                                              | gi 11559925         | 57 kDa        | 1.0         | 1.0         | 1.00        |
| protein POF1B [Homo sapiens]                                                                            | gi 193794853        | 68 kDa        | 1.0         | 1.0         | 1.00        |
| DNA-directed RNA polymerase III subunit RPC4 [Homo sapiens]                                             | gi 55769552         | 44 kDa        | 1.0         | 1.0         | 1.00        |
| NADH dehydrogenase [ubiquinone] iron-sulfur protein 3, mitochondrial precursor [Homo sapiens]           | gi 4758788          | 30 kDa        | 1.0         | 1.0         | 1.00        |
| succinate dehydrogenase [ubiquinone] iron-sulfur subunit, mitochondrial precursor [Homo sapiens]        | gi 115387094        | 32 kDa        | 1.0         | 1.0         | 1.00        |
| glutamine-dependent NAD(+) synthetase [Homo sapiens]                                                    | gi 41393551         | 79 kDa        | 1.0         | 1.0         | 1.00        |
| heat shock protein beta-1 [Homo sapiens]                                                                | gi 4504517          | 23 kDa        | 1.0         | 1.0         | 1.00        |
| cystatin-A [Homo sapiens]                                                                               | gi 4885165          | 11 kDa        | 1.0         | 1.0         | 1.00        |
| mitochondrial import inner membrane translocase subunit TIM50 [Homo sapiens]                            | gi 48526509         | 50 kDa        | 1.0         | 1.0         | 1.00        |

|                                                                                          |                 |         |      |      |      |
|------------------------------------------------------------------------------------------|-----------------|---------|------|------|------|
| guanine nucleotide-binding protein G(I)/G(S)/G(T) subunit beta-2 [Homo sapiens]          | gi 20357529     | 37 kDa  | 1.0  | 1.0  | 1.00 |
| protein-glutamine gamma-glutamyltransferase E [Homo sapiens]                             | gi 189458821    | 77 kDa  | 1.0  | 1.0  | 1.00 |
| 60S ribosomal protein L19 [Homo sapiens]                                                 | gi 4506609      | 23 kDa  | 1.0  | 1.0  | 1.00 |
| small nuclear ribonucleoprotein Sm D2 isoform 1 [Homo sapiens]                           | gi 4759158      | 14 kDa  | 1.0  | 1.0  | 1.00 |
| calmodulin-like protein 3 [Homo sapiens]                                                 | gi 4885111      | 17 kDa  | 1.0  | 1.0  | 1.00 |
| pyruvate dehydrogenase E1 component subunit alpha, somatic form, mitochondrial isoform 2 | gi 291084742    | 48 kDa  | 1.0  | 1.0  | 1.00 |
| cytochrome b-c1 complex subunit Rieske, mitochondrial [Homo sapiens]                     | gi 163644321    | 30 kDa  | 1.0  | 1.0  | 1.00 |
| serine/arginine-rich splicing factor 6 [Homo sapiens]                                    | gi 20127499     | 40 kDa  | 1.0  | 1.0  | 1.00 |
| PREDICTED: liver carboxylesterase 1 isoform X1 [Homo sapiens]                            | gi 530423536    | 62 kDa  | 19.0 | 19.3 | 1.02 |
| 78 kDa glucose-regulated protein precursor [Homo sapiens]                                | gi 16507237     | 72 kDa  | 23.0 | 23.5 | 1.02 |
| tubulin beta-4B chain [Homo sapiens]                                                     | gi 5174735      | 50 kDa  | 4.0  | 4.1  | 1.04 |
| glutathione S-transferase A2 [Homo sapiens]                                              | gi 215276987    | 26 kDa  | 4.0  | 4.1  | 1.04 |
| 40S ribosomal protein S14 [Homo sapiens]                                                 | gi 5032051 (+2) | 16 kDa  | 4.0  | 4.1  | 1.04 |
| 40S ribosomal protein S5 [Homo sapiens]                                                  | gi 13904870     | 23 kDa  | 4.0  | 4.1  | 1.04 |
| actin-like protein 8 [Homo sapiens]                                                      | gi 227498241    | 41 kDa  | 4.0  | 4.1  | 1.04 |
| transmembrane protein 33 [Homo sapiens]                                                  | gi 224589127    | 28 kDa  | 4.0  | 4.1  | 1.04 |
| splicing factor, proline- and glutamine-rich [Homo sapiens]                              | gi 4826998      | 76 kDa  | 4.0  | 4.1  | 1.04 |
| enoyl-CoA hydratase, mitochondrial [Homo sapiens]                                        | gi 194097323    | 31 kDa  | 4.0  | 4.1  | 1.04 |
| acyl-coenzyme A thioesterase 1 [Homo sapiens]                                            | gi 81230485     | 46 kDa  | 4.0  | 4.1  | 1.04 |
| heat shock protein 75 kDa, mitochondrial isoform 1 precursor [Homo sapiens]              | gi 155722983    | 80 kDa  | 4.0  | 4.1  | 1.04 |
| 40S ribosomal protein S2 [Homo sapiens]                                                  | gi 15055539     | 31 kDa  | 4.0  | 4.1  | 1.04 |
| T-complex protein 1 subunit theta isoform 1 [Homo sapiens]                               | gi 48762932     | 60 kDa  | 4.0  | 4.1  | 1.04 |
| fibronectin type-III domain-containing protein 3A isoform 1 [Homo sapiens]               | gi 118918395    | 132 kDa | 4.0  | 4.1  | 1.04 |
| glycine dehydrogenase (decarboxylating), mitochondrial precursor [Homo sapiens]          | gi 108773801    | 113 kDa | 4.0  | 4.1  | 1.04 |
| transducin beta-like protein 2 precursor [Homo sapiens]                                  | gi 7549793      | 50 kDa  | 4.0  | 4.1  | 1.04 |
| D-3-phosphoglycerate dehydrogenase [Homo sapiens]                                        | gi 23308577     | 57 kDa  | 4.0  | 4.1  | 1.04 |
| BAG family molecular chaperone regulator 2 [Homo sapiens]                                | gi 4757834      | 24 kDa  | 8.0  | 8.3  | 1.04 |
| PREDICTED: multifunctional protein ADE2 isoform X1 [Homo sapiens]                        | gi 578808622    | 94 kDa  | 8.0  | 8.3  | 1.04 |
| PREDICTED: carbonyl reductase family member 4 isoform X3 [Homo sapiens]                  | gi 578809567    | 27 kDa  | 5.0  | 5.5  | 1.11 |
| phosphate carrier protein, mitochondrial isoform b precursor [Homo sapiens]              | gi 4505775      | 40 kDa  | 5.0  | 5.5  | 1.11 |
| nucleophosmin isoform 1 [Homo sapiens]                                                   | gi 10835063     | 33 kDa  | 5.0  | 5.5  | 1.11 |
| dnaJ homolog subfamily B member 12 [Homo sapiens]                                        | gi 194306640    | 45 kDa  | 5.0  | 5.5  | 1.11 |
| importin subunit beta-1 isoform 1 [Homo sapiens]                                         | gi 19923142     | 97 kDa  | 5.0  | 5.5  | 1.11 |
| Na(+)/H(+) exchange regulatory cofactor NHE-RF2 isoform a [Homo sapiens]                 | gi 194018553    | 37 kDa  | 16.0 | 18.0 | 1.12 |
| heat shock protein 105 kDa isoform 1 [Homo sapiens]                                      | gi 42544159     | 97 kDa  | 11.0 | 12.4 | 1.13 |
| cytochrome b-c1 complex subunit 2, mitochondrial precursor [Homo sapiens]                | gi 50592988     | 48 kDa  | 6.0  | 6.9  | 1.15 |
| stomatin-like protein 2, mitochondrial isoform c [Homo sapiens]                          | gi 559098408    | 33 kDa  | 6.0  | 6.9  | 1.15 |
| sodium/potassium-transporting ATPase subunit alpha-1 isoform a [Homo sapiens]            | gi 21361181     | 113 kDa | 6.0  | 6.9  | 1.15 |
| beta-hexosaminidase subunit beta isoform 1 preproprotein [Homo sapiens]                  | gi 4504373      | 63 kDa  | 12.0 | 13.8 | 1.15 |
| eukaryotic initiation factor 4A-I isoform 1 [Homo sapiens]                               | gi 4503529      | 46 kDa  | 12.0 | 13.8 | 1.15 |
| PREDICTED: CAD protein isoform X4 [Homo sapiens]                                         | gi 530368098    | 236 kDa | 35.0 | 41.5 | 1.18 |
| trifunctional enzyme subunit alpha, mitochondrial precursor [Homo sapiens]               | gi 20127408     | 83 kDa  | 23.0 | 27.6 | 1.20 |
| peptidyl-prolyl cis-trans isomerase A isoform 1 [Homo sapiens]                           | gi 10863927     | 18 kDa  | 8.0  | 9.7  | 1.21 |
| guanine nucleotide-binding protein subunit beta-2-like 1 [Homo sapiens]                  | gi 5174447      | 35 kDa  | 8.0  | 9.7  | 1.21 |
| argininosuccinate lyase isoform 1 [Homo sapiens]                                         | gi 31541964     | 52 kDa  | 9.0  | 11.1 | 1.23 |
| protein arginine N-methyltransferase 5 isoform a [Homo sapiens]                          | gi 20070220     | 73 kDa  | 9.0  | 11.1 | 1.23 |
| acyl-CoA synthetase family member 2, mitochondrial isoform 2 precursor [Homo sapiens]    | gi 156151445    | 68 kDa  | 18.0 | 22.1 | 1.23 |
| heat shock cognate 71 kDa protein isoform 1 [Homo sapiens]                               | gi 5729877      | 71 kDa  | 33.0 | 41.5 | 1.26 |
| aspartate aminotransferase, mitochondrial isoform 1 precursor [Homo sapiens]             | gi 73486658     | 48 kDa  | 12.0 | 15.2 | 1.27 |
| 40S ribosomal protein S3 isoform 1 [Homo sapiens]                                        | gi 15718687     | 27 kDa  | 13.0 | 16.6 | 1.28 |
| long-chain-fatty-acid--CoA ligase 5 isoform a [Homo sapiens]                             | gi 42794756     | 82 kDa  | 14.0 | 18.0 | 1.28 |
| ornithine aminotransferase, mitochondrial isoform 1 precursor [Homo sapiens]             | gi 4557809      | 49 kDa  | 15.0 | 19.3 | 1.29 |
| villin-1 [Homo sapiens]                                                                  | gi 194394237    | 93 kDa  | 23.0 | 30.4 | 1.32 |
| glutamate dehydrogenase 1, mitochondrial precursor [Homo sapiens]                        | gi 4885281      | 61 kDa  | 25.0 | 33.2 | 1.33 |
| histone H2A type 1-B/E [Homo sapiens]                                                    | gi 10645195     | 14 kDa  | 2.0  | 2.8  | 1.38 |
| filaggrin-2 [Homo sapiens]                                                               | gi 62122917     | 248 kDa | 2.0  | 2.8  | 1.38 |
| 60S ribosomal protein L11 isoform 1 [Homo sapiens]                                       | gi 15431290     | 20 kDa  | 2.0  | 2.8  | 1.38 |
| nucleoside diphosphate kinase, mitochondrial isoform a precursor [Homo sapiens]          | gi 4826862      | 21 kDa  | 2.0  | 2.8  | 1.38 |
| suprabasin isoform 1 precursor [Homo sapiens]                                            | gi 260436922    | 61 kDa  | 2.0  | 2.8  | 1.38 |
| NAD kinase 2, mitochondrial isoform 1 [Homo sapiens]                                     | gi 146134341    | 49 kDa  | 2.0  | 2.8  | 1.38 |
| 14-3-3 protein zeta/delta [Homo sapiens]                                                 | gi 208973238    | 28 kDa  | 2.0  | 2.8  | 1.38 |
| glutathione S-transferase P [Homo sapiens]                                               | gi 4504183      | 23 kDa  | 2.0  | 2.8  | 1.38 |
| minor histocompatibility antigen H13 isoform 1 [Homo sapiens]                            | gi 23308607     | 41 kDa  | 2.0  | 2.8  | 1.38 |
| 3 beta-hydroxysteroid dehydrogenase/Delta 5--4-isomerase type 1 [Homo sapiens]           | gi 4504507      | 42 kDa  | 2.0  | 2.8  | 1.38 |
| sodium/potassium-transporting ATPase subunit beta-3 [Homo sapiens]                       | gi 4502281      | 32 kDa  | 2.0  | 2.8  | 1.38 |
| protein transport protein Sec61 subunit beta [Homo sapiens]                              | gi 5803165      | 10 kDa  | 2.0  | 2.8  | 1.38 |
| peptide deformylase, mitochondrial precursor [Homo sapiens]                              | gi 11641243     | 27 kDa  | 2.0  | 2.8  | 1.38 |
| surfeit locus protein 4 isoform 1 [Homo sapiens]                                         | gi 19557691     | 30 kDa  | 2.0  | 2.8  | 1.38 |
| magnesium transporter protein 1 [Homo sapiens]                                           | gi 215983058    | 42 kDa  | 2.0  | 2.8  | 1.38 |
| 40S ribosomal protein S9 [Homo sapiens]                                                  | gi 14141193     | 23 kDa  | 2.0  | 2.8  | 1.38 |
| 60S ribosomal protein L30 [Homo sapiens]                                                 | gi 4506631      | 13 kDa  | 2.0  | 2.8  | 1.38 |
| 60S ribosomal protein L18a [Homo sapiens]                                                | gi 11415026     | 21 kDa  | 2.0  | 2.8  | 1.38 |

|                                                                                                  |              |         |      |      |      |
|--------------------------------------------------------------------------------------------------|--------------|---------|------|------|------|
| poly(rC)-binding protein 1 [Homo sapiens]                                                        | gi 222352151 | 37 kDa  | 2.0  | 2.8  | 1.38 |
| putative adenosylhomocysteinase 2 isoform a [Homo sapiens]                                       | gi 21361647  | 59 kDa  | 2.0  | 2.8  | 1.38 |
| cell division control protein 42 homolog isoform 1 precursor [Homo sapiens]                      | gi 4757952   | 21 kDa  | 2.0  | 2.8  | 1.38 |
| E3 ubiquitin-protein ligase RNF5 [Homo sapiens]                                                  | gi 5902054   | 20 kDa  | 2.0  | 2.8  | 1.38 |
| argininosuccinate synthase [Homo sapiens]                                                        | gi 16950633  | 47 kDa  | 2.0  | 2.8  | 1.38 |
| ATP synthase subunit O, mitochondrial precursor [Homo sapiens]                                   | gi 4502303   | 23 kDa  | 2.0  | 2.8  | 1.38 |
| peptidyl-prolyl cis-trans isomerase B precursor [Homo sapiens]                                   | gi 4758950   | 24 kDa  | 2.0  | 2.8  | 1.38 |
| GDP-mannose 4,6 dehydratase isoform 2 [Homo sapiens]                                             | gi 359718934 | 39 kDa  | 2.0  | 2.8  | 1.38 |
| 40S ribosomal protein S15a [Homo sapiens]                                                        | gi 14165469  | 15 kDa  | 3.0  | 4.1  | 1.38 |
| 40S ribosomal protein S27 [Homo sapiens]                                                         | gi 4506711   | 9 kDa   | 3.0  | 4.1  | 1.38 |
| aromatic-L-amino-acid decarboxylase isoform 1 [Homo sapiens]                                     | gi 132814448 | 54 kDa  | 3.0  | 4.1  | 1.38 |
| isocitrate dehydrogenase [NADP], mitochondrial isoform 1 precursor [Homo sapiens]                | gi 28178832  | 51 kDa  | 3.0  | 4.1  | 1.38 |
| erythrocyte band 7 integral membrane protein isoform a [Homo sapiens]                            | gi 38016911  | 32 kDa  | 3.0  | 4.1  | 1.38 |
| PREDICTED: anterior gradient protein 2 homolog isoform X1 [Homo sapiens]                         | gi 530384410 | 20 kDa  | 3.0  | 4.1  | 1.38 |
| L-lactate dehydrogenase B chain [Homo sapiens]                                                   | gi 291575128 | 37 kDa  | 3.0  | 4.1  | 1.38 |
| 60S ribosomal protein L10 isoform a [Homo sapiens]                                               | gi 223890243 | 25 kDa  | 3.0  | 4.1  | 1.38 |
| aldose reductase [Homo sapiens]                                                                  | gi 4502049   | 36 kDa  | 3.0  | 4.1  | 1.38 |
| 60S ribosomal protein L3 isoform a [Homo sapiens]                                                | gi 4506649   | 46 kDa  | 3.0  | 4.1  | 1.38 |
| histone H4 [Homo sapiens]                                                                        | gi 11415030  | 11 kDa  | 4.0  | 5.5  | 1.38 |
| hornerin [Homo sapiens]                                                                          | gi 57864582  | 282 kDa | 4.0  | 5.5  | 1.38 |
| aldehyde dehydrogenase family 16 member A1 isoform 1 [Homo sapiens]                              | gi 223972651 | 85 kDa  | 4.0  | 5.5  | 1.38 |
| tricarboxylate transport protein, mitochondrial isoform a precursor [Homo sapiens]               | gi 21389315  | 34 kDa  | 4.0  | 5.5  | 1.38 |
| GTP-binding nuclear protein Ran isoform 1 [Homo sapiens]                                         | gi 5453555   | 24 kDa  | 4.0  | 5.5  | 1.38 |
| 40S ribosomal protein S11 [Homo sapiens]                                                         | gi 4506681   | 18 kDa  | 4.0  | 5.5  | 1.38 |
| T-complex protein 1 subunit zeta isoform a [Homo sapiens]                                        | gi 4502643   | 58 kDa  | 4.0  | 5.5  | 1.38 |
| isocitrate dehydrogenase [NAD] subunit alpha, mitochondrial precursor [Homo sapiens]             | gi 5031777   | 40 kDa  | 4.0  | 5.5  | 1.38 |
| serine/threonine-protein phosphatase 2A 65 kDa regulatory subunit A alpha isoform [Homo sapiens] | gi 21361399  | 65 kDa  | 4.0  | 5.5  | 1.38 |
| protein NipSnap homolog 2 isoform 1 [Homo sapiens]                                               | gi 4503937   | 34 kDa  | 5.0  | 6.9  | 1.38 |
| delta(3,5)-Delta(2,4)-dienoyl-CoA isomerase, mitochondrial precursor [Homo sapiens]              | gi 70995211  | 36 kDa  | 5.0  | 6.9  | 1.38 |
| 40S ribosomal protein SA [Homo sapiens]                                                          | gi 59859885  | 33 kDa  | 5.0  | 6.9  | 1.38 |
| 60S acidic ribosomal protein P0 [Homo sapiens]                                                   | gi 16933546  | 34 kDa  | 5.0  | 6.9  | 1.38 |
| PREDICTED: probable serine carboxypeptidase CPVL isoform X1 [Homo sapiens]                       | gi 530384848 | 54 kDa  | 6.0  | 8.3  | 1.38 |
| glutaminase kidney isoform, mitochondrial isoform 2 [Homo sapiens]                               | gi 373251164 | 65 kDa  | 6.0  | 8.3  | 1.38 |
| peroxiredoxin-1 [Homo sapiens]                                                                   | gi 320461711 | 22 kDa  | 6.0  | 8.3  | 1.38 |
| eukaryotic peptide chain release factor subunit 1 isoform 1 [Homo sapiens]                       | gi 4759034   | 49 kDa  | 6.0  | 8.3  | 1.38 |
| adenosylhomocysteinase isoform 1 [Homo sapiens]                                                  | gi 9951915   | 48 kDa  | 7.0  | 9.7  | 1.38 |
| elongation factor 1-alpha 1 [Homo sapiens]                                                       | gi 4503471   | 50 kDa  | 8.0  | 11.1 | 1.38 |
| leucine-rich repeat-containing protein 59 [Homo sapiens]                                         | gi 40254924  | 35 kDa  | 10.0 | 13.8 | 1.38 |
| destrin isoform a [Homo sapiens]                                                                 | gi 5802966   | 19 kDa  | 10.0 | 13.8 | 1.38 |
| alpha-2-macroglobulin receptor-associated protein precursor [Homo sapiens]                       | gi 4505021   | 41 kDa  | 10.0 | 13.8 | 1.38 |
| filamin-A isoform 1 [Homo sapiens]                                                               | gi 116063573 | 280 kDa | 12.0 | 16.6 | 1.38 |
| volume-regulated anion channel subunit LRRC8D [Homo sapiens]                                     | gi 197333706 | 98 kDa  | 15.0 | 20.7 | 1.38 |
| heat shock protein HSP 90-beta isoform a [Homo sapiens]                                          | gi 20149594  | 83 kDa  | 15.0 | 22.1 | 1.47 |
| actin, cytoplasmic 2 [Homo sapiens]                                                              | gi 316659409 | 42 kDa  | 12.0 | 18.0 | 1.50 |
| mitochondrial-processing peptidase subunit beta precursor [Homo sapiens]                         | gi 94538354  | 54 kDa  | 11.0 | 16.6 | 1.51 |
| E3 ubiquitin-protein ligase TRIM21 [Homo sapiens]                                                | gi 15208660  | 54 kDa  | 10.0 | 15.2 | 1.52 |
| volume-regulated anion channel subunit LRRC8E isoform 1 [Homo sapiens]                           | gi 392996931 | 90 kDa  | 10.0 | 15.2 | 1.52 |
| ADP/ATP translocase 2 [Homo sapiens]                                                             | gi 156071459 | 33 kDa  | 9.0  | 13.8 | 1.54 |
| aldehyde dehydrogenase, mitochondrial isoform 1 precursor [Homo sapiens]                         | gi 25777732  | 56 kDa  | 9.0  | 13.8 | 1.54 |
| cleft lip and palate transmembrane protein 1 isoform 2 [Homo sapiens]                            | gi 4502897   | 76 kDa  | 8.0  | 12.4 | 1.55 |
| elongation factor 1-gamma [Homo sapiens]                                                         | gi 4503481   | 50 kDa  | 8.0  | 12.4 | 1.55 |
| serum albumin preproprotein [Homo sapiens]                                                       | gi 4502027   | 69 kDa  | 7.0  | 11.1 | 1.58 |
| cytochrome b-c1 complex subunit 1, mitochondrial precursor [Homo sapiens]                        | gi 46593007  | 53 kDa  | 7.0  | 11.1 | 1.58 |
| glyceraldehyde-3-phosphate dehydrogenase isoform 1 [Homo sapiens]                                | gi 576583519 | 36 kDa  | 6.0  | 9.7  | 1.61 |
| emerin [Homo sapiens]                                                                            | gi 4557553   | 29 kDa  | 6.0  | 9.7  | 1.61 |
| isovaleryl-CoA dehydrogenase, mitochondrial isoform 1 precursor [Homo sapiens]                   | gi 226958412 | 47 kDa  | 6.0  | 9.7  | 1.61 |
| erlin-1 [Homo sapiens]                                                                           | gi 154800487 | 39 kDa  | 6.0  | 9.7  | 1.61 |
| PREDICTED: acyl-coenzyme A thioesterase 9, mitochondrial isoform X1 [Homo sapiens]               | gi 530421012 | 51 kDa  | 12.0 | 19.3 | 1.61 |
| long-chain fatty acid transport protein 3 [Homo sapiens]                                         | gi 13236579  | 79 kDa  | 5.0  | 8.3  | 1.66 |
| thrombospondin-1 precursor [Homo sapiens]                                                        | gi 40317626  | 129 kDa | 10.0 | 16.6 | 1.66 |
| alpha-enolase isoform 1 [Homo sapiens]                                                           | gi 4503571   | 47 kDa  | 9.0  | 15.2 | 1.69 |
| ferritin heavy chain [Homo sapiens]                                                              | gi 56682959  | 21 kDa  | 4.0  | 6.9  | 1.73 |
| ADP-ribosylation factor 1 [Homo sapiens]                                                         | gi 4502201   | 21 kDa  | 4.0  | 6.9  | 1.73 |
| pyruvate carboxylase, mitochondrial precursor [Homo sapiens]                                     | gi 106049292 | 130 kDa | 4.0  | 6.9  | 1.73 |
| eukaryotic translation initiation factor 5A-1 isoform B [Homo sapiens]                           | gi 219555710 | 17 kDa  | 4.0  | 6.9  | 1.73 |
| T-complex protein 1 subunit delta isoform a [Homo sapiens]                                       | gi 38455427  | 58 kDa  | 4.0  | 6.9  | 1.73 |
| ras-related protein Rab-10 [Homo sapiens]                                                        | gi 256222019 | 23 kDa  | 4.0  | 6.9  | 1.73 |
| T-complex protein 1 subunit epsilon [Homo sapiens]                                               | gi 24307939  | 60 kDa  | 4.0  | 6.9  | 1.73 |
| alpha-2-HS-glycoprotein preproprotein [Homo sapiens]                                             | gi 156523970 | 39 kDa  | 3.0  | 5.5  | 1.84 |
| protein NipSnap homolog 1 isoform 1 [Homo sapiens]                                               | gi 193211616 | 33 kDa  | 3.0  | 5.5  | 1.84 |
| N-acetylglucosamine-6-sulfatase precursor [Homo sapiens]                                         | gi 4504061   | 62 kDa  | 3.0  | 5.5  | 1.84 |
| 40S ribosomal protein S25 [Homo sapiens]                                                         | gi 4506707   | 14 kDa  | 3.0  | 5.5  | 1.84 |



|                                                                                                                  |              |         |      |      |      |
|------------------------------------------------------------------------------------------------------------------|--------------|---------|------|------|------|
| junctional adhesion molecule A precursor [Homo sapiens]                                                          | gi 8393638   | 33 kDa  | 3.0  | 5.5  | 1.84 |
| PREDICTED: alpha-2-macroglobulin isoform X1 [Homo sapiens]                                                       | gi 578822814 | 167 kDa | 3.0  | 5.5  | 1.84 |
| non-specific lipid-transfer protein isoform 1 proprotein [Homo sapiens]                                          | gi 19923233  | 59 kDa  | 3.0  | 5.5  | 1.84 |
| trifunctional enzyme subunit beta, mitochondrial isoform 1 precursor [Homo sapiens]                              | gi 4504327   | 51 kDa  | 9.0  | 16.6 | 1.84 |
| methylmalonate-semialdehyde dehydrogenase [acylating], mitochondrial isoform 1 precursor [Homo sapiens]          | gi 11095441  | 58 kDa  | 7.0  | 13.8 | 1.97 |
| elongation factor 2 [Homo sapiens]                                                                               | gi 4503483   | 95 kDa  | 7.0  | 13.8 | 1.97 |
| neurolysin, mitochondrial [Homo sapiens]                                                                         | gi 14149738  | 81 kDa  | 2.0  | 4.1  | 2.07 |
| thioredoxin-dependent peroxide reductase, mitochondrial isoform a precursor [Homo sapiens]                       | gi 5802974   | 28 kDa  | 2.0  | 4.1  | 2.07 |
| galectin-3 isoform 1 [Homo sapiens]                                                                              | gi 115430223 | 26 kDa  | 2.0  | 4.1  | 2.07 |
| elongation factor 1-delta isoform 2 [Homo sapiens]                                                               | gi 194239727 | 31 kDa  | 2.0  | 4.1  | 2.07 |
| very-long-chain (3R)-3-hydroxyacyl-CoA dehydratase 3 [Homo sapiens]                                              | gi 117168248 | 43 kDa  | 2.0  | 4.1  | 2.07 |
| alpha-fetoprotein precursor [Homo sapiens]                                                                       | gi 4501989   | 69 kDa  | 2.0  | 4.1  | 2.07 |
| ras-related C3 botulinum toxin substrate 1 isoform Rac1b [Homo sapiens]                                          | gi 9845509   | 23 kDa  | 2.0  | 4.1  | 2.07 |
| ATPase family AAA domain-containing protein 3A isoform 3 [Homo sapiens]                                          | gi 283436224 | 58 kDa  | 2.0  | 4.1  | 2.07 |
| 14-3-3 protein theta [Homo sapiens]                                                                              | gi 5803227   | 28 kDa  | 4.0  | 8.3  | 2.07 |
| catalase [Homo sapiens]                                                                                          | gi 4557014   | 60 kDa  | 4.0  | 8.3  | 2.07 |
| 40S ribosomal protein S4, X isoform X isoform [Homo sapiens]                                                     | gi 4506725   | 30 kDa  | 4.0  | 8.3  | 2.07 |
| protein THEM6 precursor [Homo sapiens]                                                                           | gi 7706200   | 24 kDa  | 7.0  | 15.2 | 2.17 |
| lamin isoform A-delta50 [Homo sapiens]                                                                           | gi 544063468 | 69 kDa  | 5.0  | 11.1 | 2.21 |
| desmocollin-1 isoform Dsc1b preproprotein [Homo sapiens]                                                         | gi 4826702   | 94 kDa  | 3.0  | 6.9  | 2.30 |
| junction plakoglobin [Homo sapiens]                                                                              | gi 12056468  | 82 kDa  | 7.0  | 16.6 | 2.37 |
| succinate dehydrogenase [ubiquinone] flavoprotein subunit, mitochondrial isoform 1 [Homo sapiens]                | gi 156416003 | 73 kDa  | 6.0  | 15.2 | 2.53 |
| ferritin light chain [Homo sapiens]                                                                              | gi 20149498  | 20 kDa  | 1.0  | 2.8  | 2.76 |
| calmodulin-like protein 5 [Homo sapiens]                                                                         | gi 223278387 | 16 kDa  | 1.0  | 2.8  | 2.76 |
| protein S100-A8 [Homo sapiens]                                                                                   | gi 21614544  | 11 kDa  | 1.0  | 2.8  | 2.76 |
| galectin-7 [Homo sapiens]                                                                                        | gi 109948279 | 15 kDa  | 1.0  | 2.8  | 2.76 |
| caspase-14 precursor [Homo sapiens]                                                                              | gi 6912286   | 28 kDa  | 1.0  | 2.8  | 2.76 |
| corneodesmosin precursor [Homo sapiens]                                                                          | gi 67782356  | 52 kDa  | 1.0  | 2.8  | 2.76 |
| 60S ribosomal protein L27 [Homo sapiens]                                                                         | gi 4506623   | 16 kDa  | 1.0  | 2.8  | 2.76 |
| PREDICTED: mitochondrial carrier homolog 2 isoform X1 [Homo sapiens]                                             | gi 530395180 | 32 kDa  | 1.0  | 2.8  | 2.76 |
| peroxiredoxin-2 [Homo sapiens]                                                                                   | gi 32189392  | 22 kDa  | 1.0  | 2.8  | 2.76 |
| peptidyl-prolyl cis-trans isomerase FKBP2 precursor [Homo sapiens]                                               | gi 17149842  | 16 kDa  | 1.0  | 2.8  | 2.76 |
| nuclease-sensitive element-binding protein 1 [Homo sapiens]                                                      | gi 34098946  | 36 kDa  | 1.0  | 2.8  | 2.76 |
| serpin B12 [Homo sapiens]                                                                                        | gi 17998551  | 46 kDa  | 1.0  | 2.8  | 2.76 |
| translocan-associated protein subunit alpha isoform 1 precursor [Homo sapiens]                                   | gi 169404009 | 32 kDa  | 1.0  | 2.8  | 2.76 |
| nucleoside diphosphate kinase A isoform a [Homo sapiens]                                                         | gi 38045913  | 20 kDa  | 1.0  | 2.8  | 2.76 |
| acyl carrier protein, mitochondrial precursor [Homo sapiens]                                                     | gi 4826852   | 17 kDa  | 1.0  | 2.8  | 2.76 |
| 60S ribosomal protein L29 [Homo sapiens]                                                                         | gi 4506629   | 18 kDa  | 1.0  | 2.8  | 2.76 |
| 10 kDa heat shock protein, mitochondrial [Homo sapiens]                                                          | gi 4504523   | 11 kDa  | 1.0  | 2.8  | 2.76 |
| 60S ribosomal protein L8 [Homo sapiens]                                                                          | gi 15431306  | 28 kDa  | 1.0  | 2.8  | 2.76 |
| acetyl-CoA acetyltransferase, mitochondrial precursor [Homo sapiens]                                             | gi 4557237   | 45 kDa  | 1.0  | 2.8  | 2.76 |
| S-phase kinase-associated protein 1 isoform b [Homo sapiens]                                                     | gi 25777713  | 19 kDa  | 1.0  | 2.8  | 2.76 |
| 60S ribosomal protein L7a [Homo sapiens]                                                                         | gi 4506661   | 30 kDa  | 1.0  | 2.8  | 2.76 |
| 60S ribosomal protein L28 isoform 2 [Homo sapiens]                                                               | gi 13904866  | 16 kDa  | 1.0  | 2.8  | 2.76 |
| plakophilin-1 isoform 1a [Homo sapiens]                                                                          | gi 53729344  | 80 kDa  | 1.0  | 2.8  | 2.76 |
| pyrroline-5-carboxylate reductase 3 [Homo sapiens]                                                               | gi 198041662 | 30 kDa  | 1.0  | 2.8  | 2.76 |
| mitochondrial import inner membrane translocase subunit TIM44 [Homo sapiens]                                     | gi 33636719  | 51 kDa  | 1.0  | 2.8  | 2.76 |
| thioredoxin isoform 2 [Homo sapiens]                                                                             | gi 349732256 | 9 kDa   | 1.0  | 2.8  | 2.76 |
| 40S ribosomal protein S19 [Homo sapiens]                                                                         | gi 4506695   | 16 kDa  | 1.0  | 2.8  | 2.76 |
| ribonuclease inhibitor [Homo sapiens]                                                                            | gi 21361547  | 50 kDa  | 1.0  | 2.8  | 2.76 |
| serine-tRNA ligase, mitochondrial isoform b precursor [Homo sapiens]                                             | gi 8923421   | 58 kDa  | 1.0  | 2.8  | 2.76 |
| inter-alpha-trypsin inhibitor heavy chain H2 precursor [Homo sapiens]                                            | gi 70778918  | 106 kDa | 1.0  | 2.8  | 2.76 |
| dihydrolipoyllysine-residue succinyltransferase component of 2-oxoglutarate dehydrogenase complex [Homo sapiens] | gi 19923748  | 49 kDa  | 1.0  | 2.8  | 2.76 |
| short/branched chain specific acyl-CoA dehydrogenase, mitochondrial precursor [Homo sapiens]                     | gi 4501859   | 47 kDa  | 1.0  | 2.8  | 2.76 |
| cytochrome c oxidase subunit NDUF4A [Homo sapiens]                                                               | gi 4505357   | 9 kDa   | 1.0  | 2.8  | 2.76 |
| abnormal spindle-like microcephaly-associated protein isoform 1 [Homo sapiens]                                   | gi 126116596 | 410 kDa | 1.0  | 2.8  | 2.76 |
| zyxin [Homo sapiens]                                                                                             | gi 4508047   | 61 kDa  | 1.0  | 2.8  | 2.76 |
| small proline-rich protein 2A [Homo sapiens]                                                                     | gi 5174693   | 8 kDa   | 1.0  | 2.8  | 2.76 |
| paraplegin isoform 1 precursor [Homo sapiens]                                                                    | gi 4507173   | 88 kDa  | 1.0  | 2.8  | 2.76 |
| talin-1 [Homo sapiens]                                                                                           | gi 223029410 | 270 kDa | 1.0  | 2.8  | 2.76 |
| PREDICTED: microtubule-actin cross-linking factor 1 isoform X14 [Homo sapiens]                                   | gi 578798808 | 861 kDa | 1.0  | 2.8  | 2.76 |
| succinyl-CoA ligase [ADP/GDP-forming] subunit alpha, mitochondrial precursor [Homo sapiens]                      | gi 109452591 | 36 kDa  | 1.0  | 2.8  | 2.76 |
| citrate synthase, mitochondrial precursor [Homo sapiens]                                                         | gi 38327625  | 52 kDa  | 1.0  | 2.8  | 2.76 |
| all-trans-retinol 13,14-reductase precursor [Homo sapiens]                                                       | gi 203098013 | 67 kDa  | 1.0  | 2.8  | 2.76 |
| 60S ribosomal protein L23 [Homo sapiens]                                                                         | gi 4506605   | 15 kDa  | 2.0  | 5.5  | 2.76 |
| desmoglein-1 preproprotein [Homo sapiens]                                                                        | gi 119703744 | 114 kDa | 4.0  | 11.1 | 2.76 |
| 40S ribosomal protein S18 [Homo sapiens]                                                                         | gi 11968182  | 18 kDa  | 5.0  | 13.8 | 2.76 |
| chitinase domain-containing protein 1 isoform a precursor [Homo sapiens]                                         | gi 218083142 | 45 kDa  | 5.0  | 13.8 | 2.76 |
| desmoplakin isoform I [Homo sapiens]                                                                             | gi 58530840  | 332 kDa | 22.0 | 66.3 | 3.02 |
| thioredoxin domain-containing protein 12 precursor [Homo sapiens]                                                | gi 7705696   | 19 kDa  | 1.0  | 4.1  | 4.15 |
| keratinocyte proline-rich protein [Homo sapiens]                                                                 | gi 68563515  | 64 kDa  | 1.0  | 4.1  | 4.15 |
| endoplasmic reticulum resident protein 44 precursor [Homo sapiens]                                               | gi 52487191  | 47 kDa  | 1.0  | 4.1  | 4.15 |

|                                                                                          |              |         |     |     |      |
|------------------------------------------------------------------------------------------|--------------|---------|-----|-----|------|
| ATP synthase subunit beta, mitochondrial precursor [Homo sapiens]                        | gi 32189394  | 57 kDa  | 1.0 | 4.1 | 4.15 |
| enoyl-CoA delta isomerase 1, mitochondrial isoform 2 precursor [Homo sapiens]            | gi 295842266 | 31 kDa  | 1.0 | 4.1 | 4.15 |
| triosephosphate isomerase isoform 2 [Homo sapiens]                                       | gi 226529917 | 31 kDa  | 1.0 | 4.1 | 4.15 |
| filaggrin [Homo sapiens]                                                                 | gi 60097902  | 435 kDa | 1.0 | 4.1 | 4.15 |
| serpin B3 [Homo sapiens]                                                                 | gi 5902072   | 45 kDa  | 1.0 | 4.1 | 4.15 |
| PREDICTED: hydroxyacyl-coenzyme A dehydrogenase, mitochondrial isoform X1 [Homo sapiens] | gi 530377639 | 35 kDa  | 1.0 | 4.1 | 4.15 |
| hydroxymethylglutaryl-CoA lyase, mitochondrial isoform 1 precursor [Homo sapiens]        | gi 62198232  | 34 kDa  | 1.0 | 4.1 | 4.15 |
| methylosome protein 50 [Homo sapiens]                                                    | gi 13129110  | 37 kDa  | 1.0 | 5.5 | 5.53 |
| transmembrane protein 201 isoform 1 [Homo sapiens]                                       | gi 262399371 | 72 kDa  | 1.0 | 5.5 | 5.53 |
| fumarate hydratase, mitochondrial [Homo sapiens]                                         | gi 19743875  | 55 kDa  | 1.0 | 6.9 | 6.91 |
